# Supplementary material
Source: Royal Society of Chemistry journal article supplement (doi:10.1039/d5ce01218j)
Supplement: d5ce01218j1.pdf [file d5ce01218j1.pdf]

## Supplementary Information

### Study on the preparation of $\text{Mn}_2\text{V}_2\text{O}_7$ microstructure with enhanced electrochemical lithium storage performance

Mengwen Hu, Piyu Gong, Jumiao Shi, Shuo Tao, Haibo Li, Suyuan Zeng\*, Lei Wang\*

Department of Chemistry, Liaocheng University, Liaocheng, Shandong 252059, P.R. China

Corresponding authors: drzengsy@163.com, wangl@ustc.edu

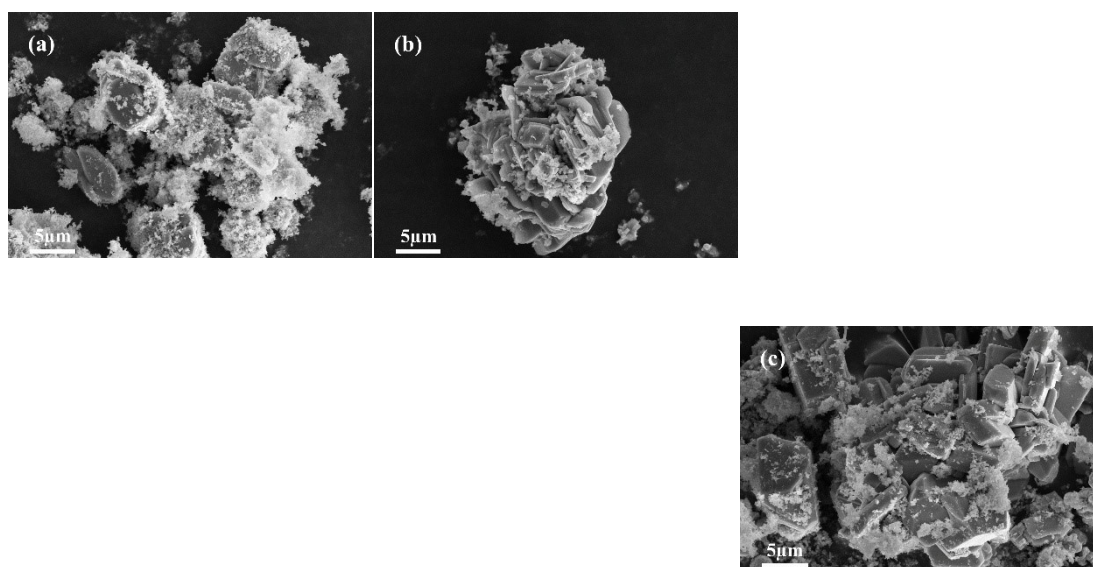

**Fig. S1** Scanning electron microscope images of three  $\text{Mn}_2\text{V}_2\text{O}_7$  precursor materials.

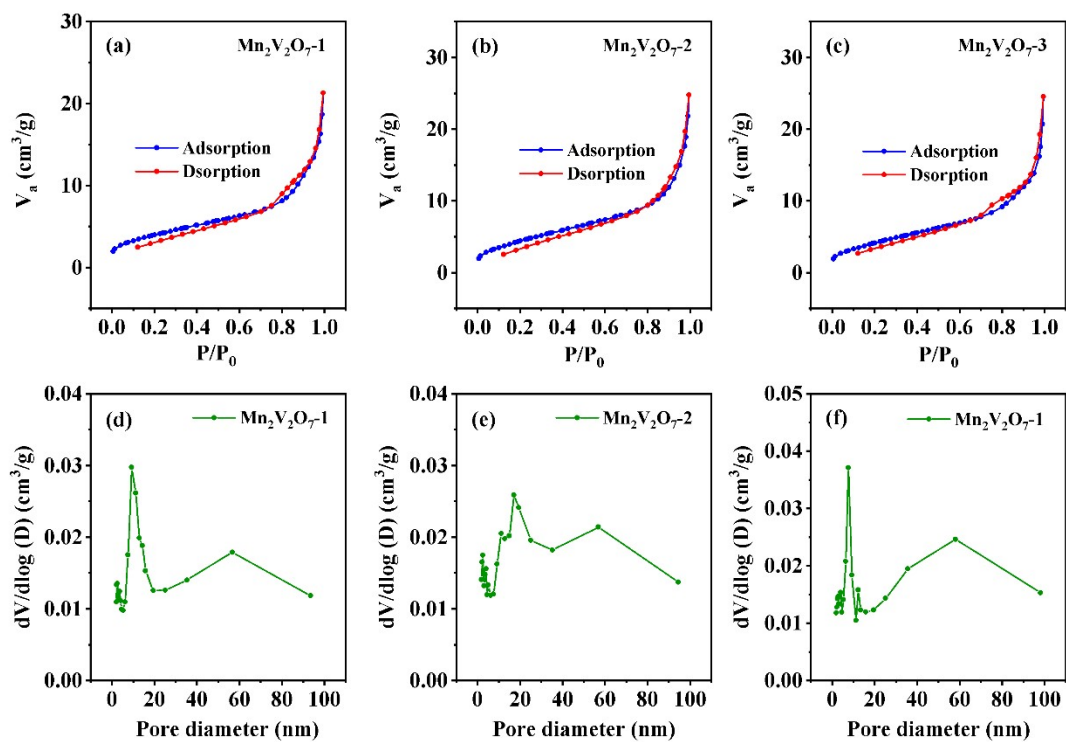

**Fig. S2** Nitrogen adsorption-desorption isotherms and pore size distribution images of  $\text{Mn}_2\text{V}_2\text{O}_7-1$  (a, d),  $\text{Mn}_2\text{V}_2\text{O}_7-2$  (b, e) and  $\text{Mn}_2\text{V}_2\text{O}_7-3$  (c, f) materials.

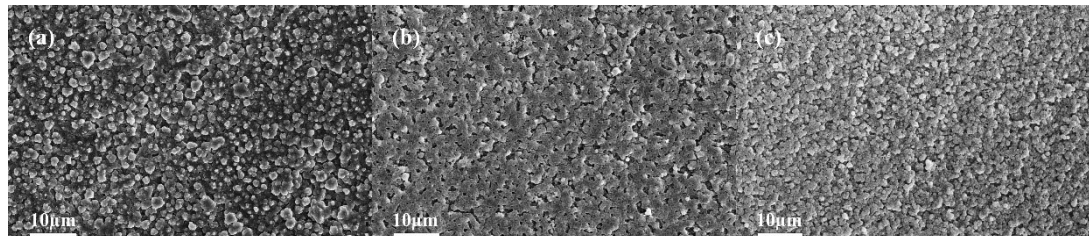

**Fig. S3** Morphology of  $\text{Mn}_2\text{V}_2\text{O}_7-1$  (a),  $\text{Mn}_2\text{V}_2\text{O}_7-2$  (b) and  $\text{Mn}_2\text{V}_2\text{O}_7-3$  (c) electrodes after 1000 cycles at a current density of  $5.0 \text{ A g}^{-1}$ .
